# Supplementary material
Source: PubMed Central journal article supplement (PMC7467771)
Supplement: mp0c00610_si_001.pdf [file mp0c00610_si_001.pdf]

## Supporting data for

### Lipophilic arginine esters: The gateway to preservatives without side effects

Authors: Iram Shahzadi<sup>a</sup>, Aamir Jalil<sup>a</sup>, Mulazim Hussain Asim<sup>a,b</sup>, Andrea Hupfauf<sup>c</sup>, Ronald Gust<sup>c</sup>, Philipp Alexander Nelles<sup>d</sup>, Ludwig Knabl<sup>d</sup>, Andreas Bernkop-Schnürch<sup>a,\*</sup>

<sup>a</sup>Center for Chemistry and Biomedicine, Department of Pharmaceutical Technology, Institute of Pharmacy, University of Innsbruck, Innrain 80-82, A-6020 Innsbruck, Austria.

<sup>b</sup>Department of Pharmaceutics, Faculty of Pharmacy, University of Sargodha, 40100 Sargodha, Pakistan.

<sup>c</sup>Center for Chemistry and Biomedicine, Department of Pharmaceutical Chemistry, Institute of Pharmacy, University of Innsbruck, Innrain 80-82, A-6020 Innsbruck, Austria.

<sup>d</sup>Institute of Hygiene and Medical Microbiology, Department of Hygiene, Microbiology and Public Health, Medical University of Innsbruck, Schöpfstrasse 41, A-6020 Innsbruck, Austria.

\*Corresponding author:

Andreas Bernkop-Schnürch, e-mail address: [andreas.bernkop@uibk.ac.at](mailto:andreas.bernkop@uibk.ac.at);

Tel: +43 512 507 58601, Fax: +43 512 507 58699

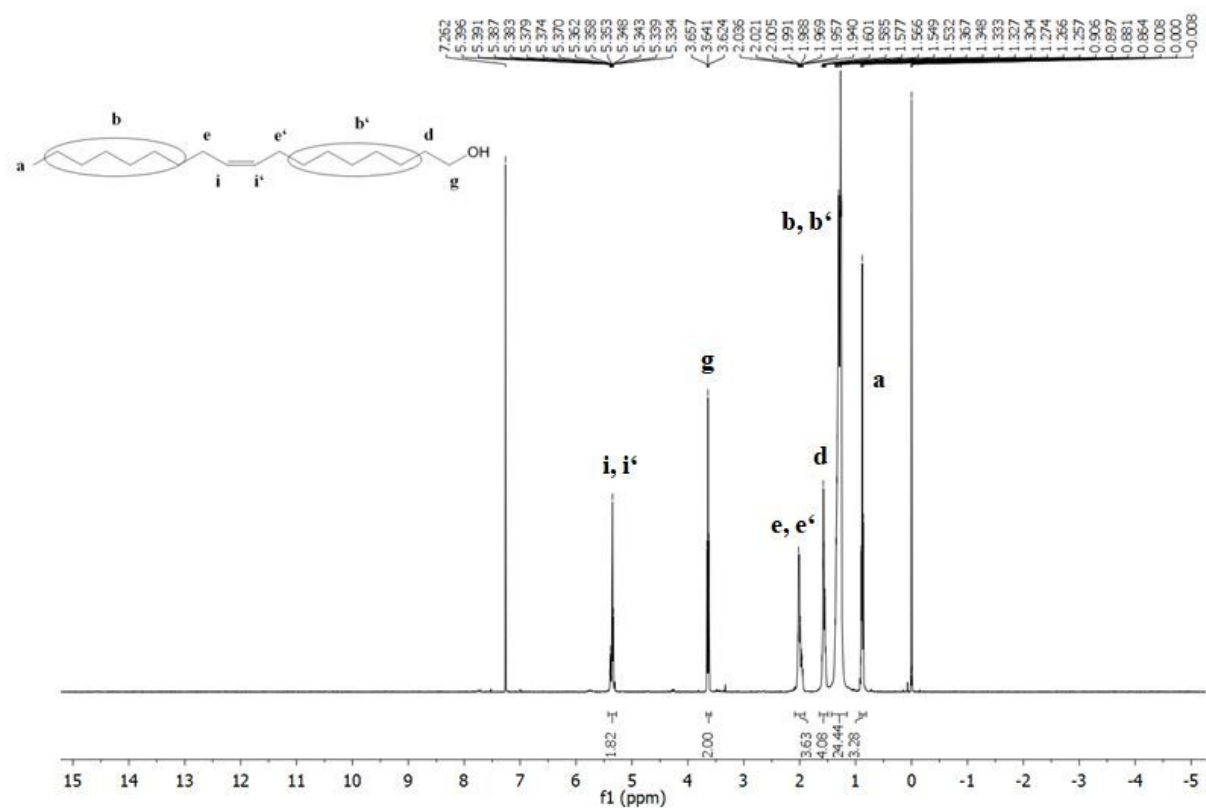

**Figure S-1:**  $^1\text{H}$ -NMR spectrum of OL (oleyl alcohol) in deuterated chloroform.

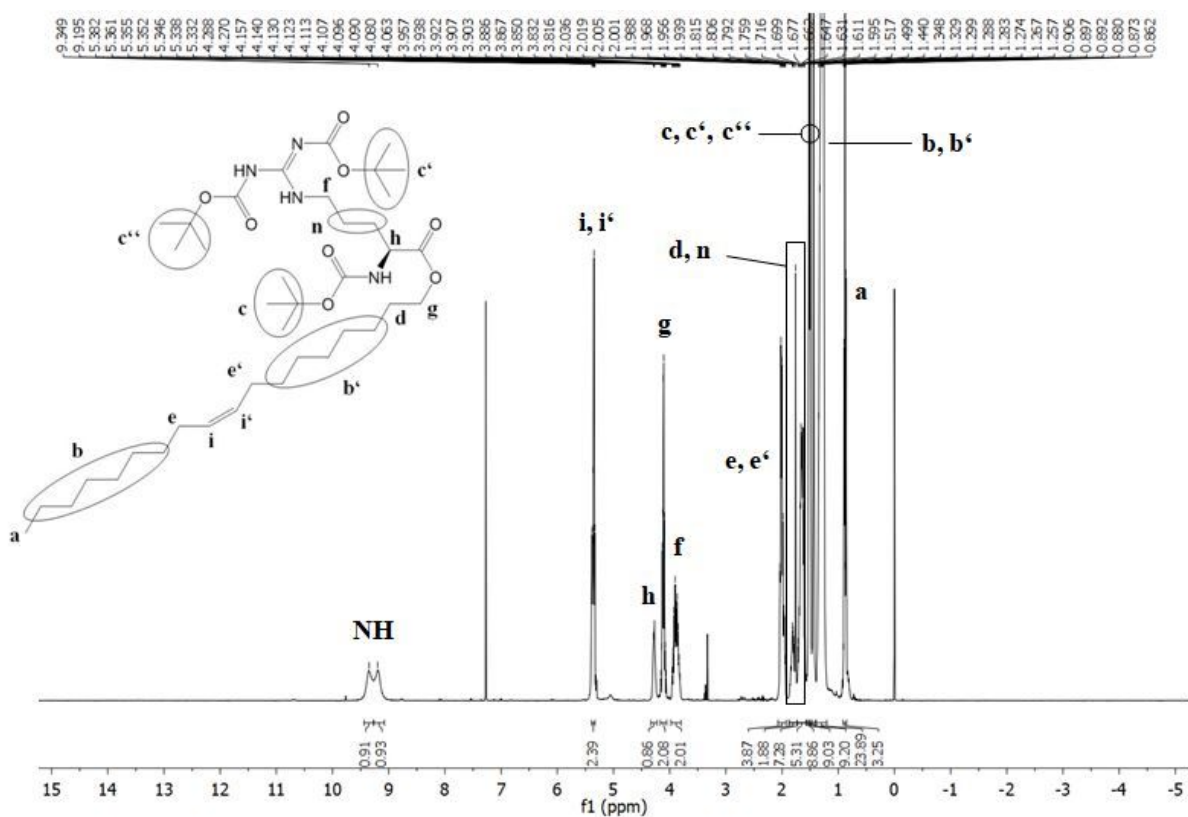

**Figure S-2:**  $^1\text{H}$ -NMR spectrum of Boc-Arg-OL (Boc-protected octadec-9-en-1-yl arginate) in deuterated chloroform.

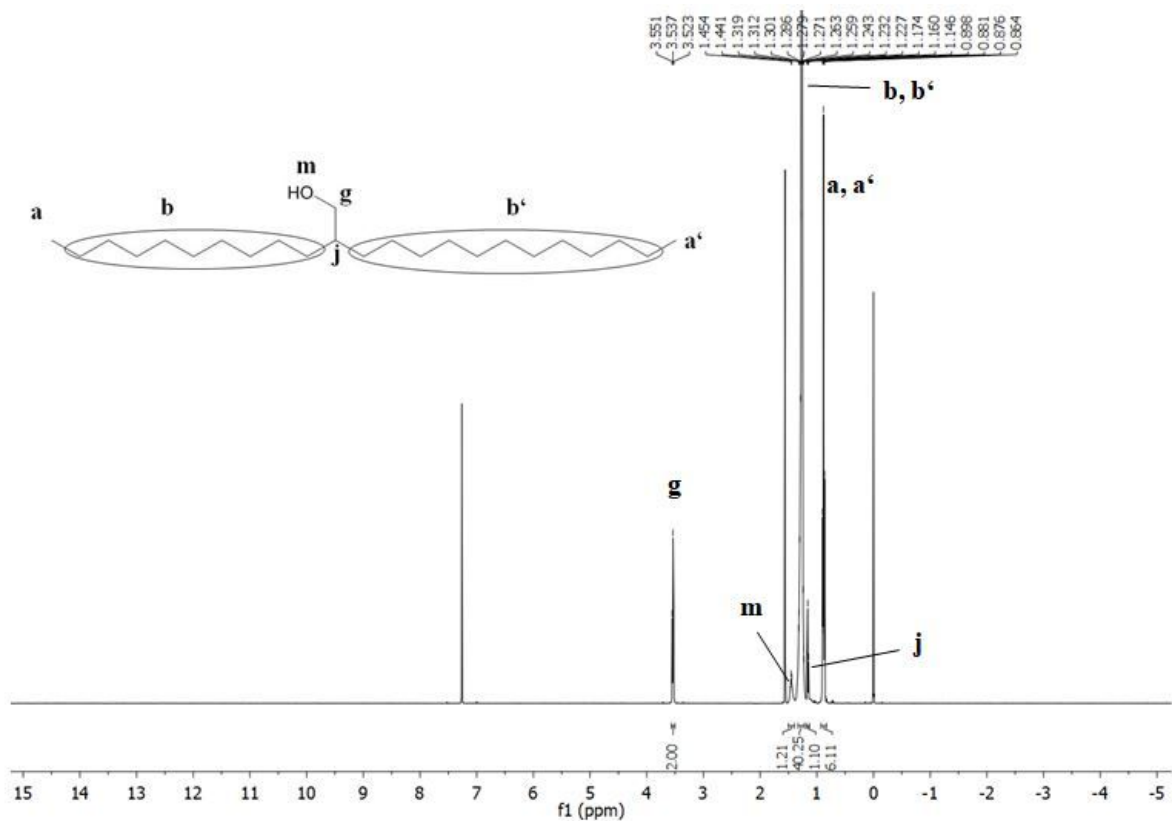

**Figure S-3:**  $^1\text{H-NMR}$  spectrum of DT (2-decyltetradecyl) in deuterated chloroform.

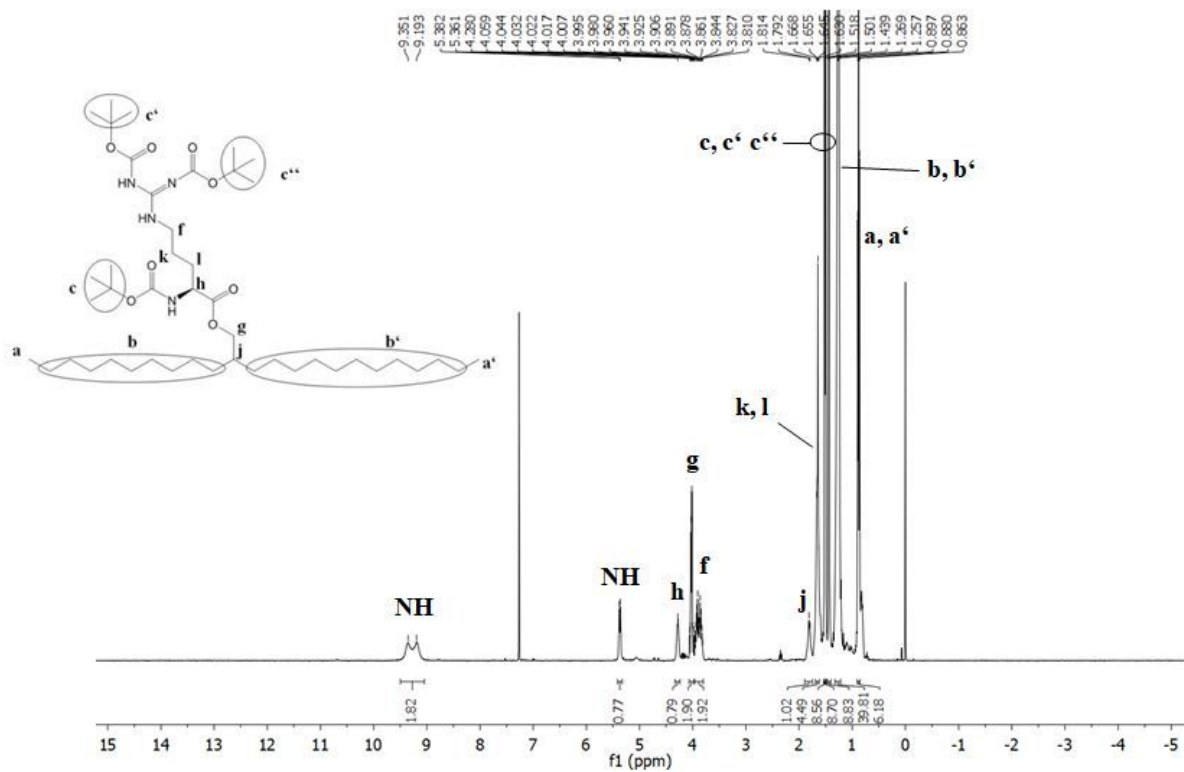

**Figure S-4:**  $^1\text{H-NMR}$  spectrum of Boc-Arg-DT (Boc-protected 2-decyltetradecyl arginine) in deuterated chloroform.

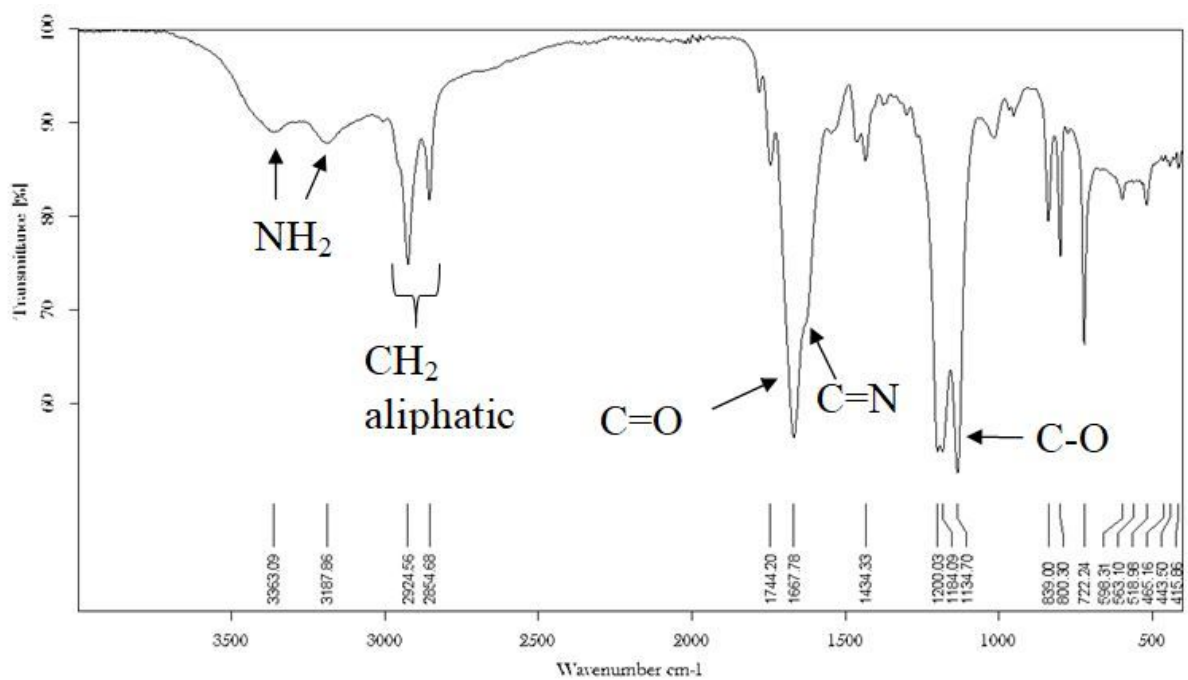

**Figure S-5:** IR spectrum of Arg-OL (octadec-9-en-1-yl arginate).

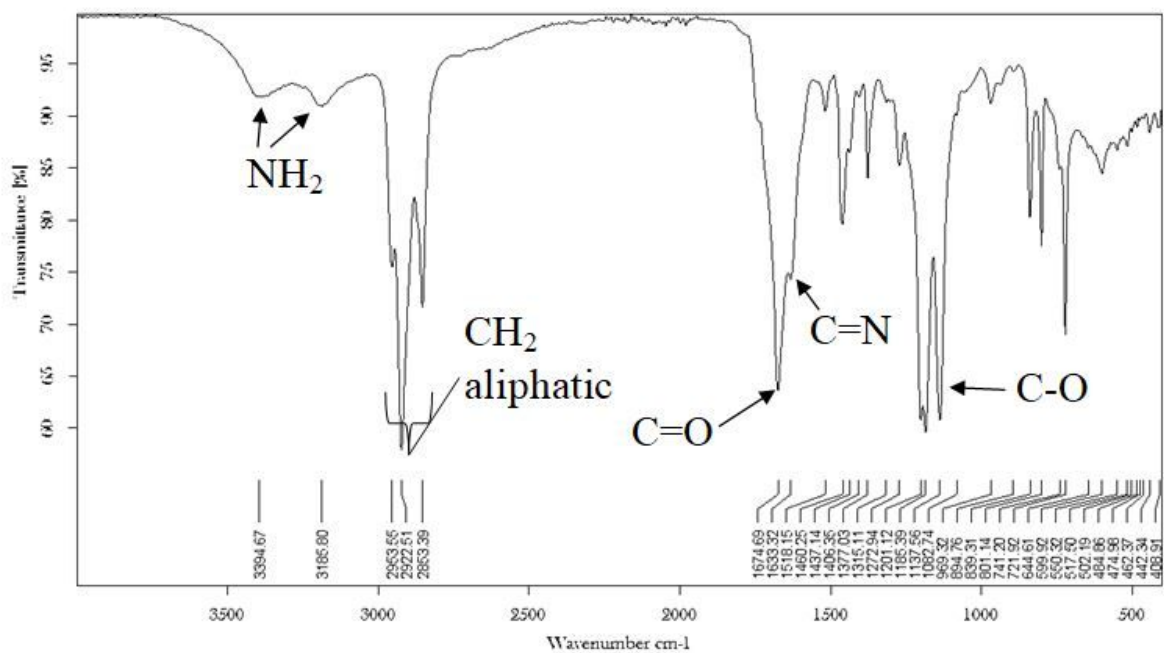

**Figure S-6:** IR-spectrum of Arg-DT (2-decyltetradecyl arginate).

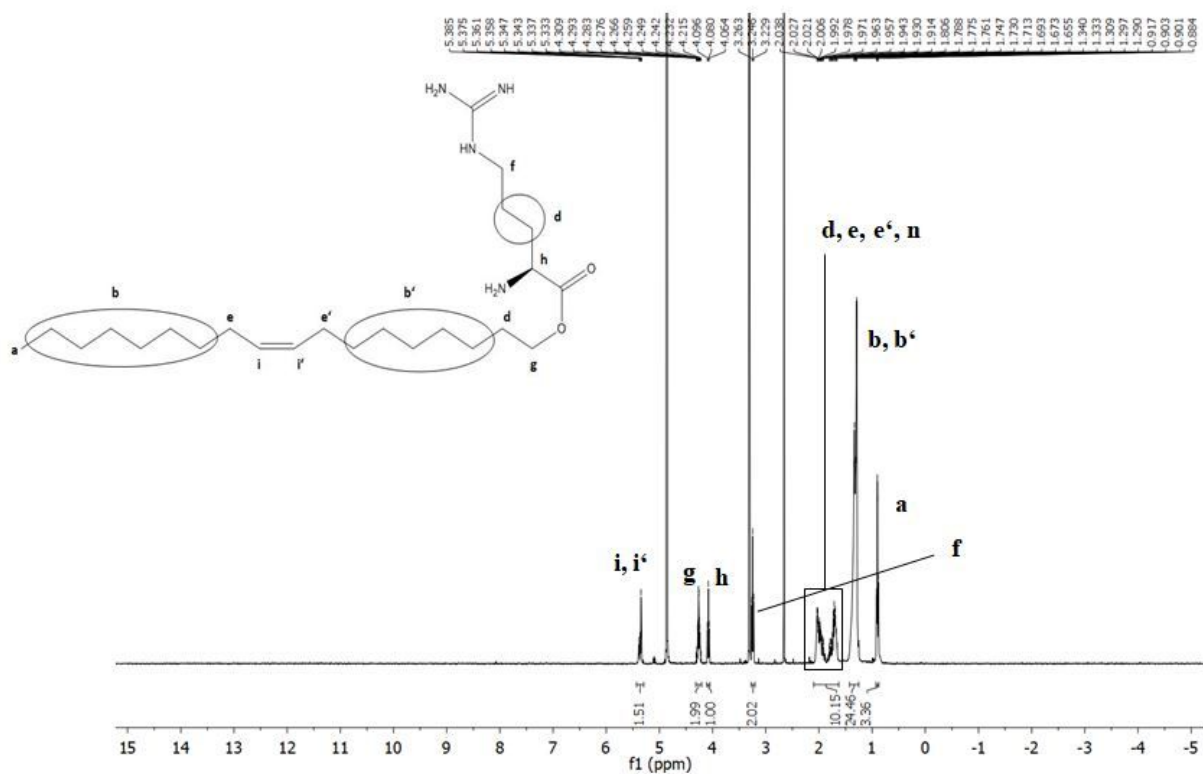

**Figure S-7:** <sup>1</sup>H-NMR spectrum of Arg-OL (octadec-9-en-1-yl arginate) in deuterated methanol.

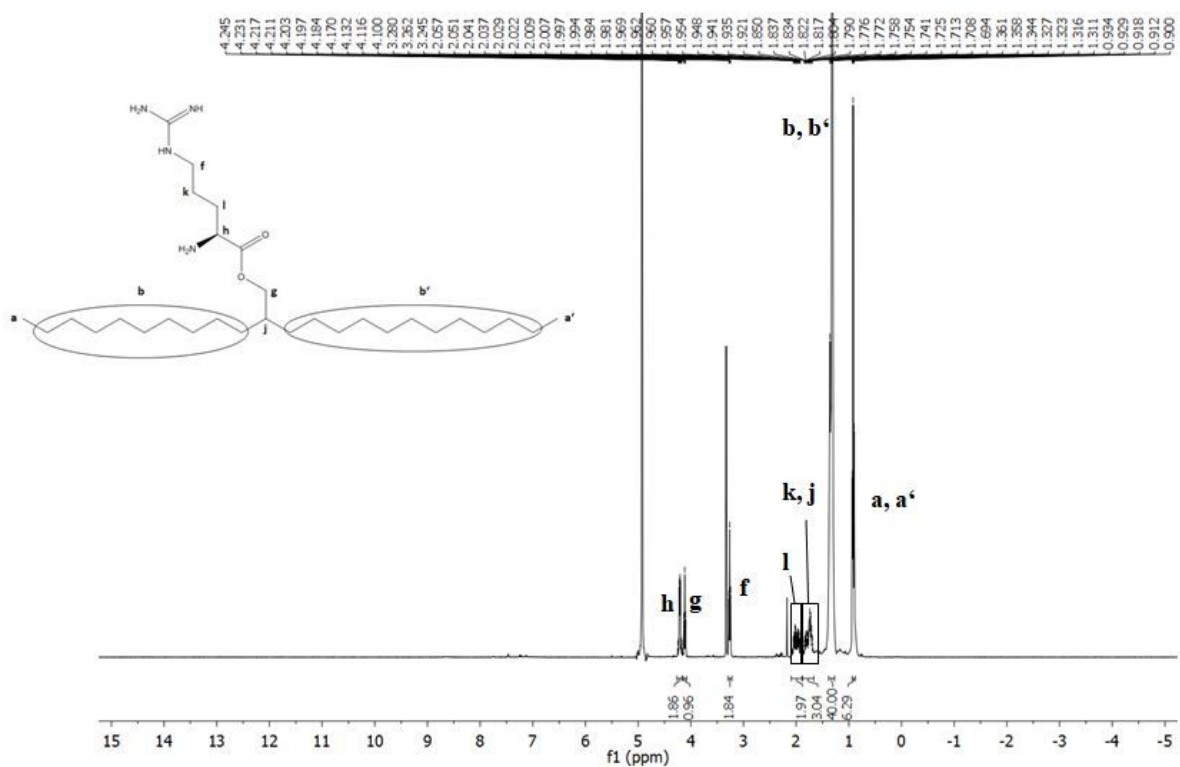

**Figure S-8:** <sup>1</sup>H-NMR spectrum of Arg-DT (2-decyltetradecyl arginate) in deuterated methanol.

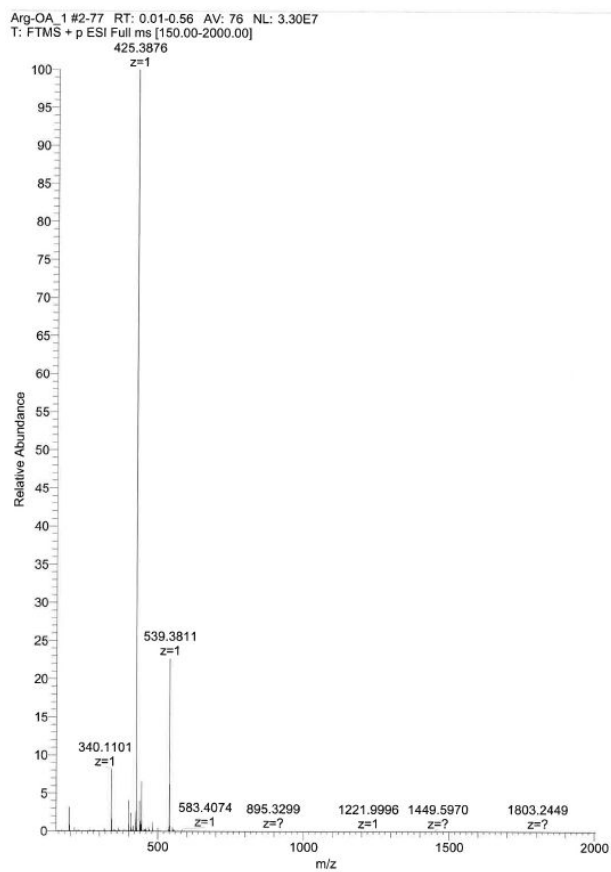

**Figure S-9:** Mass spectrum of Arg-OL (octadec-9-en-1-yl arginate).

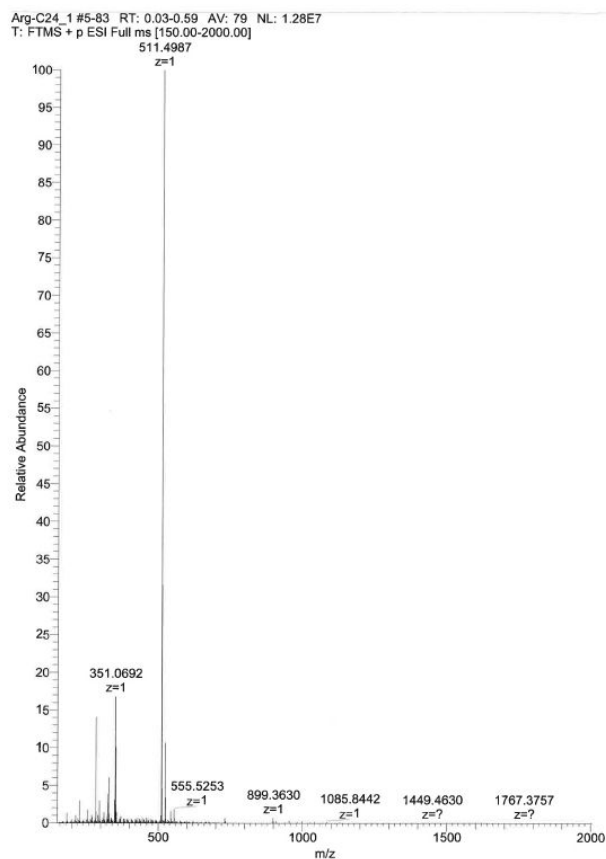

**Figure S-10:** Mass spectrum of Arg-DT (2-decyltetradecyl arginate).

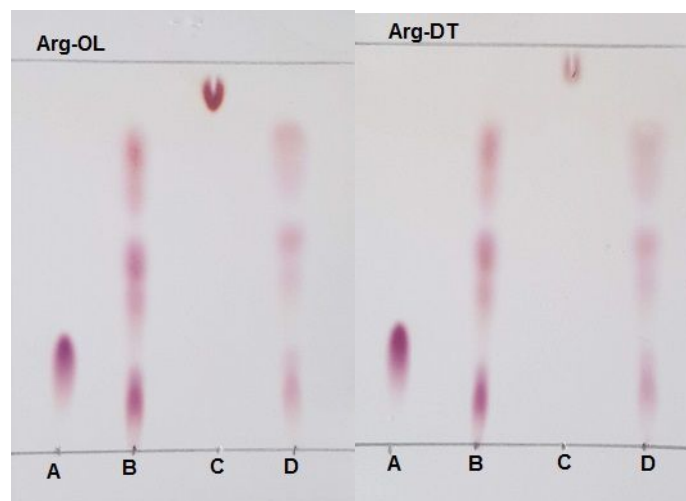

**Figure S-11.** Biodegradation of Arg-esters by lipase. On each TLC: A=L-arginine, B=lipase, C= Arg-ester before lipase addition and D= Arg-ester after incubation with lipase for 3 h. As shown by TLC, there is no ester spot after 3 h and only lipase spots are visible.

**Table S-1. Zones of inhibition against indicated bacteria**

| Test compound                                                | Observed zones of inhibition                                                                                                                       |                                                                                                                                                      |                                                                                                                                                         |                                                                                                                                                          |
|--------------------------------------------------------------|----------------------------------------------------------------------------------------------------------------------------------------------------|------------------------------------------------------------------------------------------------------------------------------------------------------|---------------------------------------------------------------------------------------------------------------------------------------------------------|----------------------------------------------------------------------------------------------------------------------------------------------------------|
| <p><b>Arg-OL</b><br/>(10 mg mL<sup>-1</sup>)</p>             |  <p>C18ES u.o.3.<br/><i>E. coli</i><br/>Ø 9mm</p>                 |  <p>C18ES u.o.3.<br/><i>S. aureus</i><br/>Ø 19mm</p>                |  <p>C18ES u.o.3.<br/><i>B. subtilis</i><br/>Ø 16mm</p>                |  <p>C18ES u.o.3.<br/><i>E. faecalis</i><br/>Ø 18mm</p>                |
| <p><b>Arg-DT</b><br/>(10 mg mL<sup>-1</sup>)</p>             |  <p>C24ES u.o.3.<br/><i>E. coli</i><br/>Ø 9mm</p>                 |  <p>C24ES u.o.3.<br/><i>S. aureus</i><br/>Ø 16mm</p>                |  <p>C24ES u.o.3.<br/><i>B. subtilis</i><br/>Ø 18mm</p>                |  <p>C24ES u.o.3.<br/><i>E. faecalis</i><br/>Ø 16mm</p>                |
| <p><b>BAC</b><br/>(10 mg mL<sup>-1</sup>)</p>                |  <p>BAC Sample ③ u.o.3.<br/><i>E. coli</i><br/>Ø 19mm</p>        |  <p>BAC Sample ③ u.o.3.<br/><i>S. aureus</i><br/>Ø 21mm</p>        |  <p>BAC Sample ③ u.o.3.<br/><i>B. subtilis</i><br/>Ø 22-23mm</p>     |  <p>BAC Sample ③ u.o.3.<br/><i>E. faecalis</i><br/>Ø 20mm</p>        |
| <p><b>Cetrimide</b><br/>(10 mg mL<sup>-1</sup>)</p>          |  <p>Cetrimide Sample ④ u.o.3.<br/><i>E. coli</i><br/>Ø 12mm</p> |  <p>Cetrimide Sample ④ u.o.3.<br/><i>S. aureus</i><br/>Ø 19mm</p> |  <p>Cetrimide Sample ④ u.o.3.<br/><i>B. subtilis</i><br/>Ø 19mm</p> |  <p>Cetrimide Sample ④ u.o.3.<br/><i>E. faecalis</i><br/>Ø 19mm</p> |
| <p><b>Negative control</b><br/>(water with 10% v/v DMSO)</p> |  <p>⊖ u.o.3.<br/><i>S. aureus</i><br/>Ø -</p>                   |  <p>⊖ u.o.3.<br/><i>E. faecalis</i><br/>Ø -</p>                   |  <p>⊖ u.o.3.<br/><i>E. coli</i><br/>Ø -</p>                         |  <p>⊖ u.o.3.<br/><i>B. subtilis</i><br/>Ø -</p>                     |
